# Supplementary material for: Combinatorial immune refocusing within the influenza hemagglutinin RBD improves cross-neutralizing antibody responses
Source: PubMed Central journal article supplement — Cell Rep. Author manuscript; Available in PMC 2024 Jan 22. (PMC10801708; doi:10.1016/j.celrep.2023.113553), 2023-12-13
Supplement: NIHMS1954799-supplement-1.pdf [file NIHMS1954799-supplement-1.pdf]

**Supplemental information**

**Combinatorial immune refocusing within  
the influenza hemagglutinin RBD  
improves cross-neutralizing antibody responses**

**Annie Dosey, Daniel Ellis, Seyhan Boyoglu-Barnum, Hubza Syeda, Mason Saunders, Michael J. Watson, John C. Kraft, Minh N. Pham, Miklos Guttman, Kelly K. Lee, Masaru Kanekiyo, and Neil P. King**

## SUPPLEMENTARY FIGURES

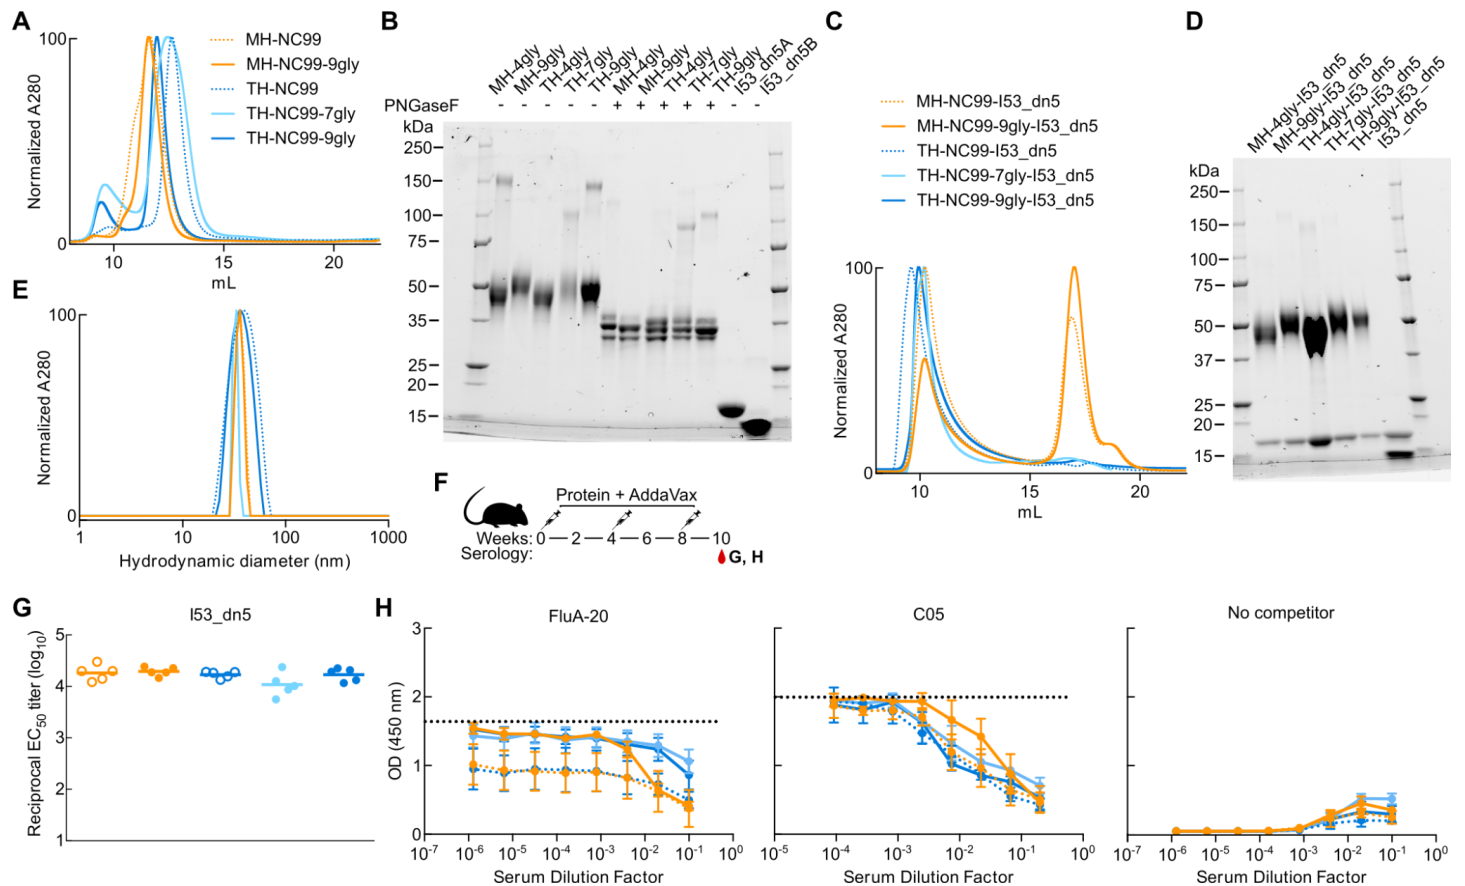

**Figure S1 Hyperglycosylated TH-NC99-I53\_dn5 Mouse Study, Related to Figure 1.**

(A) SEC chromatograms of NC99 trihead nanoparticle components on a Superdex 200 Increase 10/300 GL column.

(B) Reducing SDS-PAGE of wild-type and hyperglycosylated NC99 monoheads and trihead components without and with PNGaseF digestion, as well as bare I53\_dn5B and I53\_dn5A nanoparticle components.

(C) NC99 trihead-I53\_dn5 nanoparticle legend for Figures S1C, S1E, S1G, and S1H. SEC chromatograms of NC99 trihead-I53\_dn5 nanoparticle immunogens on a Superose 6 Increase 10/300 GL column.

(D) Reducing SDS-PAGE of NC99 trihead-I53\_dn5 nanoparticles, as well as the bare I53\_dn5 nanoparticle.

(E) DLS of NC99 trihead-I53\_dn5 nanoparticles.

(F) Schematic illustrating mouse study timeline, immunizations, and serology timepoint.

(G) ELISA binding titers in week 10 serum against the I53\_dn5 nanoparticle scaffold. Each symbol represents an individual animal, and the geometric mean of each group is indicated by the bar ( $n = 5$  mice/group).

(H) Competition ELISA curves for NC99-foldon trimer ELISA antigen between week 10 sera and either FluA-20, C05, or a no competitor negative control. Dashed line is positive control of monoclonal binding in absence of sera. Each line and error bar represents the geometric mean and geometric mean SD, respectively, of the absorbance at 450 nm ( $n = 5$  mice/group).

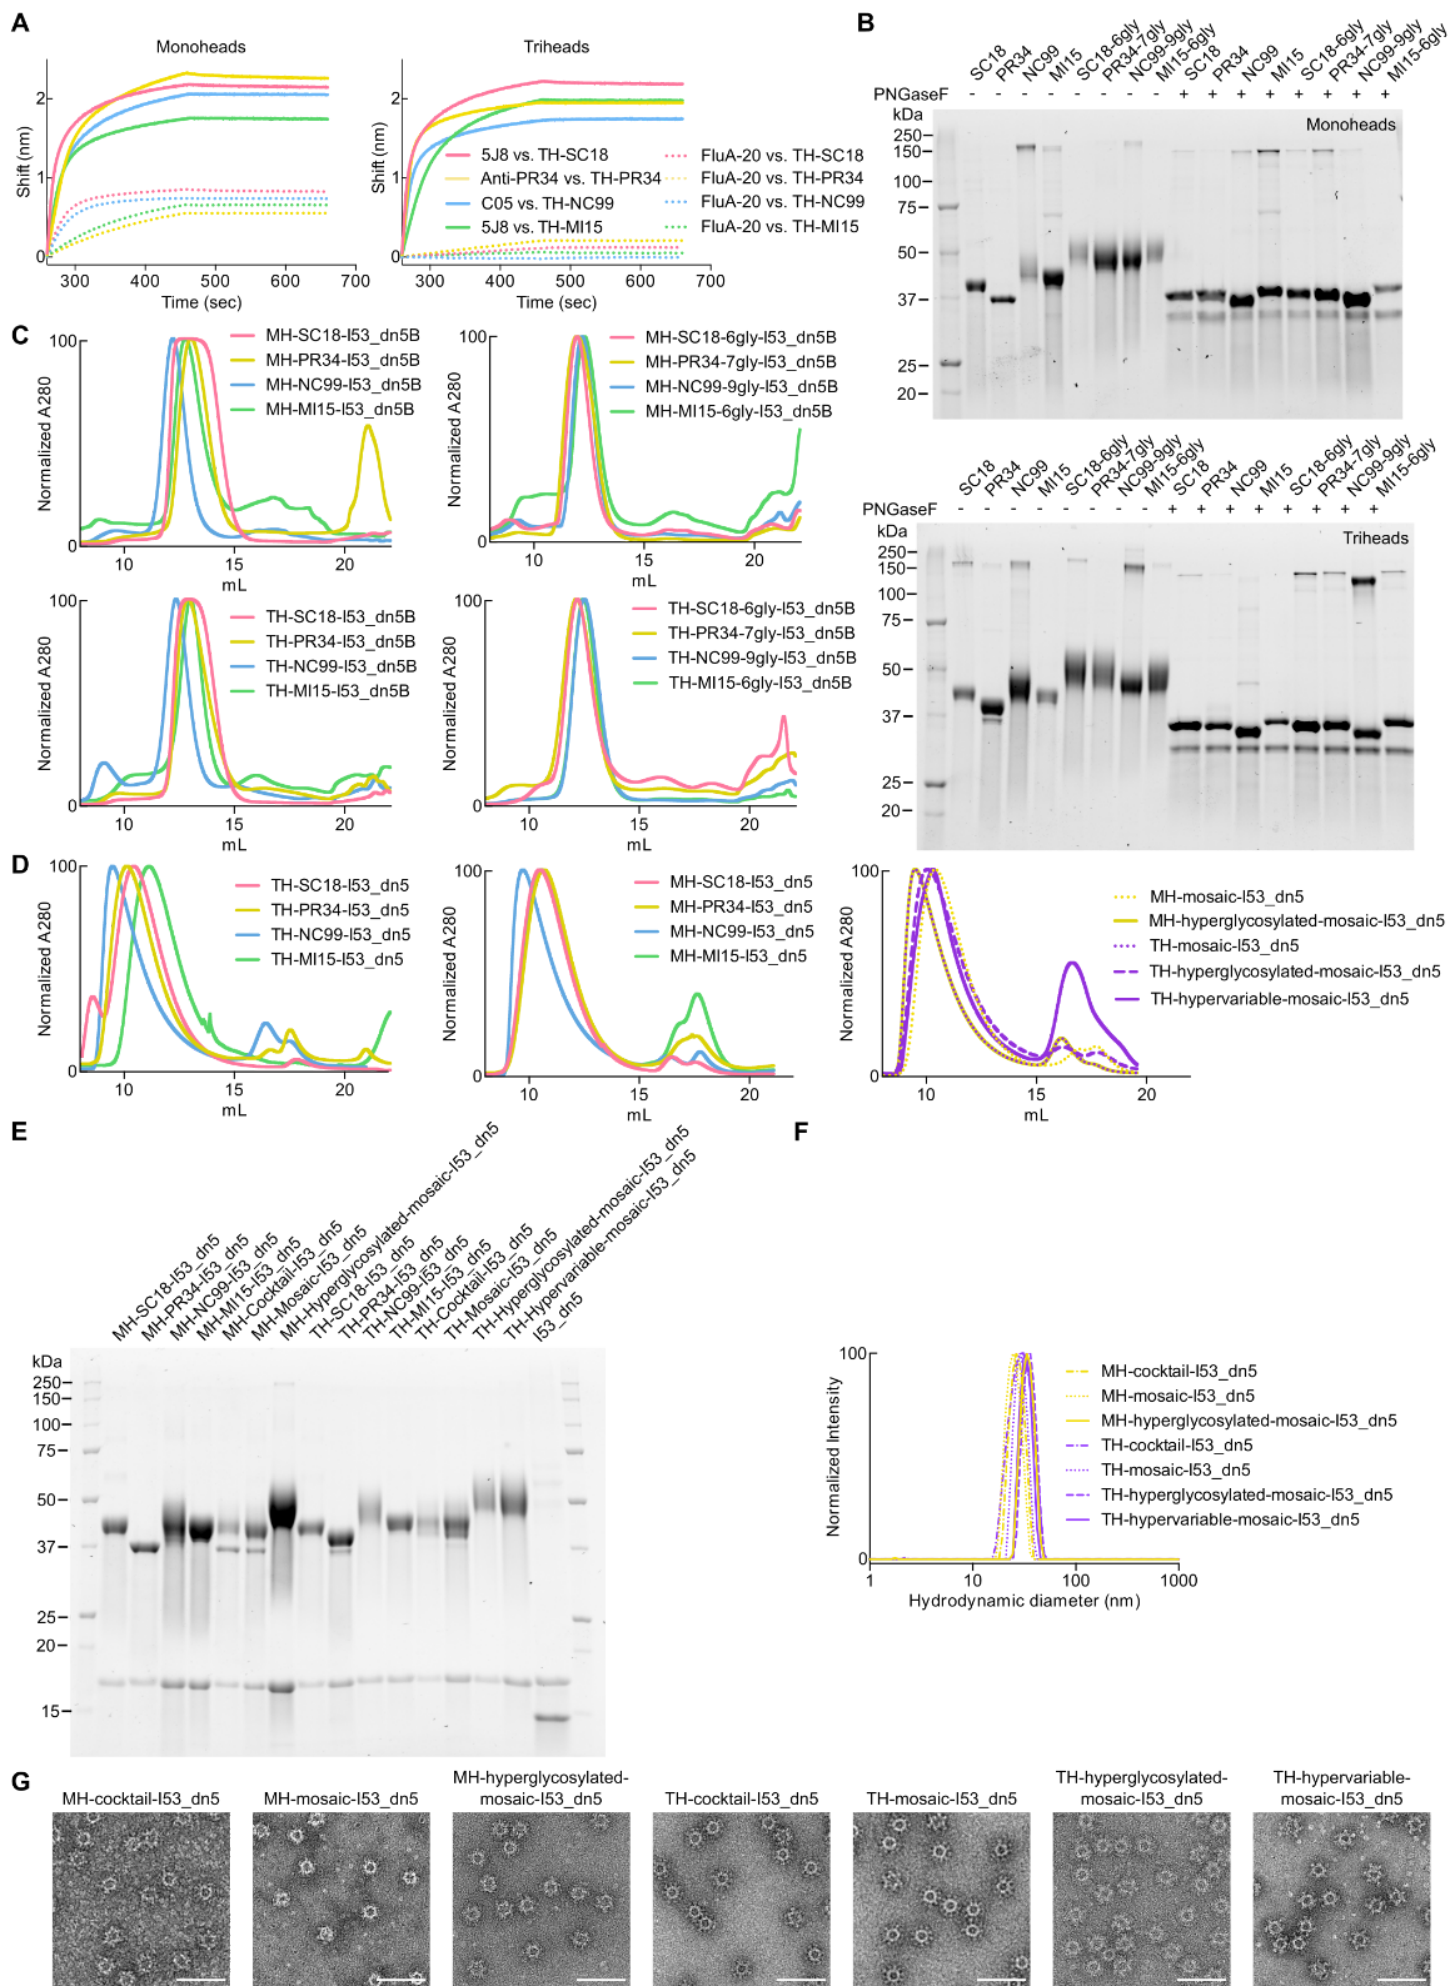

---

**Figure S2 Mosaic, Hyperglycosylated, and Hypervariable Trihead Components and Nanoparticles Purification and Characterization, Related to Figures 2 and 3.**

(A) BLI of monohead and trihead nanoparticle components against RBS-directed mAbs (5J8, anti-PR34, and C05) and FluA-20.

(B) Reducing SDS-PAGE of wild-type and hyperglycosylated monohead and trihead nanoparticle components without and with PNGaseF digestion.

(C) SEC chromatograms of wild-type and hyperglycosylated monohead and trihead nanoparticle components on a Superdex 200 Increase 10/300 GL column.

(D) SEC chromatograms of individual H1 strains of monohead- and trihead-I53\_dn5 nanoparticles and all mosaic nanoparticles on a Superose 6 Increase 10/300 GL column.

(E) Reducing SDS-PAGE of individual H1 strains of monohead- and trihead-I53\_dn5 nanoparticles and all mosaic nanoparticles, as well as the bare I53\_dn5 nanoparticle.

(F-G) F. DLS and G. nsEM of all mosaic nanoparticles. Scale bars = 100 nm.

---

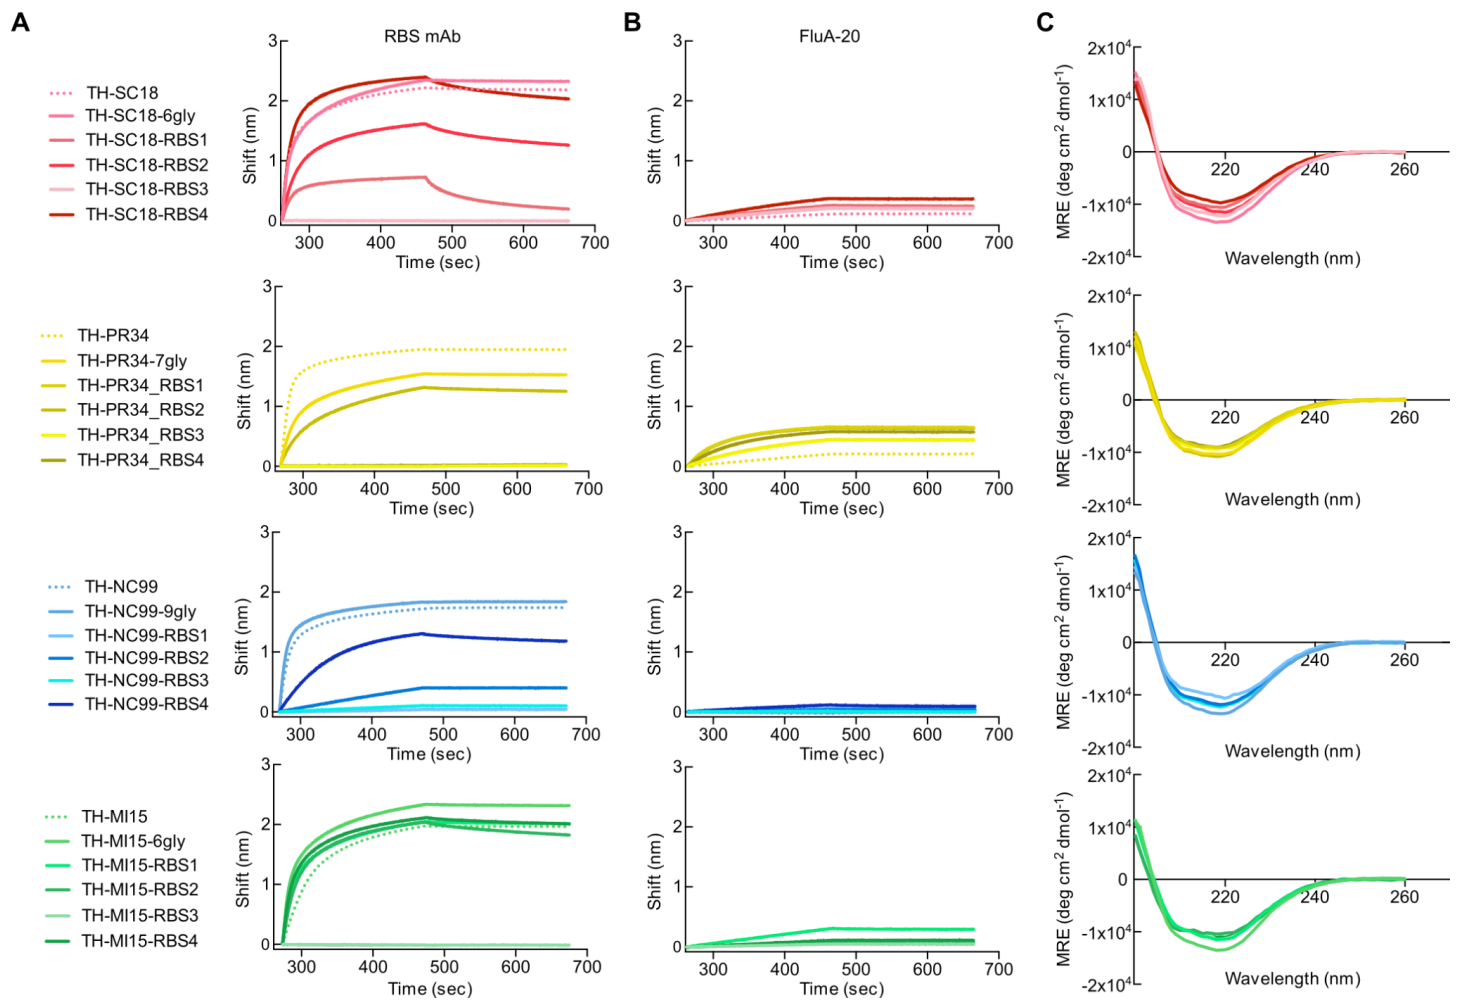

**Figure S3 Hypervariable Trihead Immunogen Biophysical Characterization, Related to Figure 3.**

(A) Legend of constructs in panels A-C. Binding of RBS-directed mAbs (5J8, anti-PR34, and C05) to all trihead components.

(B) FluA-20 binding to all trihead components.

(C) Far-UV circular dichroism (CD) spectra of all hypervariable trihead components.

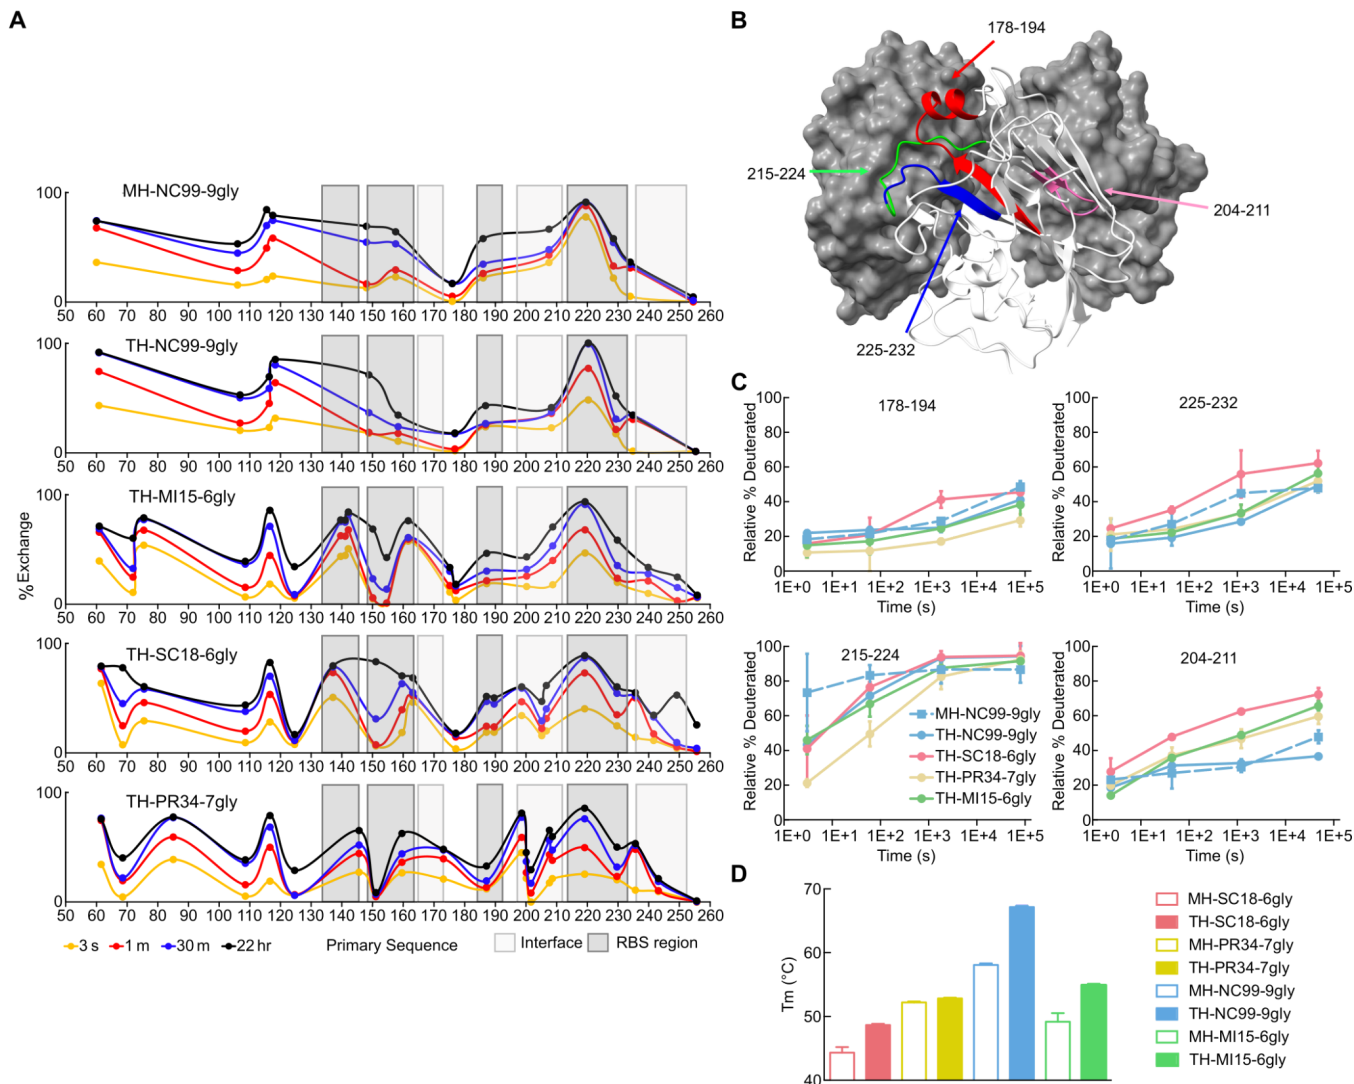

**Figure S4 Hyperglycosylated Trihead Stability Characterization by HDX and Thermal Melts, Related to Figure 2.**

(A) Deuterium uptake profiles across primary sequence plotted at four different timepoints for each construct.

(B) HDX peptides in panel B highlighted by color on the SI06 (PDB: 5UG0) HA RBD.

(C) Percent deuteriation over time for two peptides in the RBS (178-194 and 225-232) and two peptides in the RBD trimer interface (215-224 and 204-211). Each data point represents the mean of biological replicates ( $n = 3$ ) and the error bars represent  $\pm$  one SD from the mean.

(D) Melting temperatures of hyperglycosylated monoheads and triheads as measured by NanoDSF. The bars and errors bars represent the mean  $\pm$  SEM for technical replicates ( $n = 3$ ).

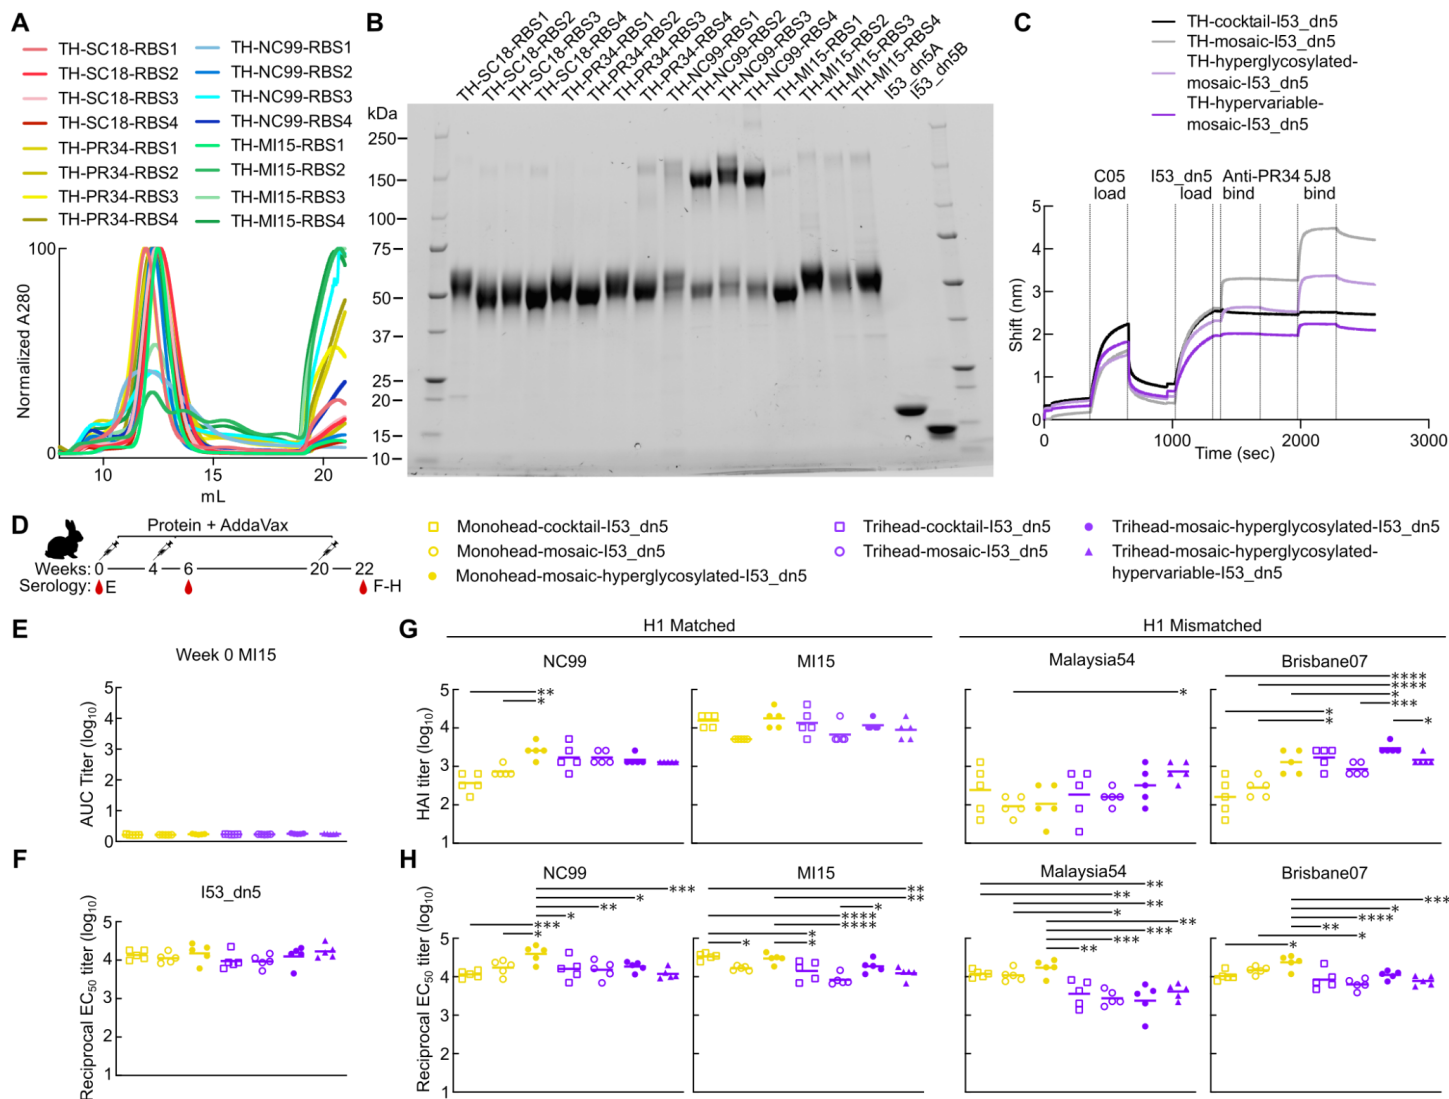

**Figure S5 Hypervariable Trihead Immunogen Purification, Mosaic Nanoparticles BLI, and Vaccine-elicited Antibody Responses at Weeks 0 and 22 in Rabbits Immunized with Monohead and Trihead Nanoparticles, Related to Figures 3 and 4.**

(A) SEC chromatograms of hypervariable trihead nanoparticle components on a Superdex 200 Increase 10/300 GL column.

(B) Reducing SDS-PAGE of hypervariable trihead-I53\_dn5 nanoparticle components, as well as bare I53\_dn5B and I53\_dn5A nanoparticle components.

(C) Sandwich BLI of trihead nanoparticle immunogens with C05 first captured on AR2G biosensors and then subsequent binding of nanoparticles, anti-PR34, and 5J8.

(D) Hypervariable trihead nanoparticle rabbit immunization schedule and groups.

(E) ELISA binding titers in week 0 serum against vaccine-matched MI15.

(F) ELISA binding titers in week 22 serum against the I53\_dn5 nanoparticle scaffold.

(G-H) G. HAI titers and H. ELISA binding titers at week 22, two weeks post second boost.

Each symbol represents an individual animal, and the geometric mean of each group is indicated by the bar ( $n = 5$  rabbits/group). Statistical significance was determined using one-way ANOVA with Tukey's multiple comparisons test; \* $p < 0.05$ ; \*\* $p < 0.01$ ; \*\*\* $p < 0.001$ ; \*\*\*\* $p < 0.0001$ .

---

**Table S1. Amino acid sequences of novel proteins used in this study, Related to STAR Methods.**

---

**Excel Spreadsheet 1.**

**Table S2. Glycopeptide sequences and occupancies, related to Figure 1, Related to Figure 1.**

| Construct    | Glycopeptide sequence                      | Sequon  | Position | Occupancy (%)                              |
|--------------|--------------------------------------------|---------|----------|--------------------------------------------|
| TH-NC99      | IAPLQLG <b>NCS</b> VAGWILGN<br>PE          | G.NCS.V | 63       | 86.6                                       |
|              | <b>NGT</b> CFPGYFADYEE                     | E.NGT.C | 94       | 99                                         |
|              | ESSWP <b>NHT</b> VTGVSASCS<br>HNGK         | P.NHT.V | 129      | 99.6                                       |
|              | NGLYP <b>NLS</b> K                         | P.NLS.K | 163      | 45.1                                       |
| TH-NC99-7gly | IAPLQLG <b>NCS</b> VAGWILGN<br>PE          | G.NCS.V | 63       | 86.2                                       |
|              | LLIN <b>ASS</b> WSYIVET                    | I.NAS.S | 81       | 46.2                                       |
|              | <b>NGT</b> CFPGYFADYEE                     | E.NGT.C | 94       | 98.8                                       |
|              | <b>NSS</b> WP <b>NHT</b> VTGVSASCS<br>HNGK | K.NSS.W | 125b     | 8.4 single,<br>91.5 double                 |
|              |                                            | P.NHT.V | 129      |                                            |
|              | NGLYP <b>NLS</b> K                         | P.NLS.K | 163      | 44.3                                       |
|              | SYV <b>NNK(S)</b>                          | N.NKS.K | 171      | 20.1                                       |
| TH-NC99-9gly | IAPLQLG <b>NCS</b> VAGWILGN<br>PE          | G.NCS.V | 63       | 70                                         |
|              | <b>NLS</b> IN <b>ASS</b> WSYIVE            | C.NLS.I | 77       | 63 single,<br>37 double                    |
|              |                                            | I.NAS.S | 81       |                                            |
|              | <b>NGT</b> CFPGYFADYEE                     | E.NGT.C | 94       | 99.6                                       |
|              | <b>NSS</b> WP <b>NHT</b> VTGVSASCS<br>HNGK | K.NSS.W | 125b     | 5.0 single,<br>95.0 double                 |
|              |                                            | P.NHT.V | 129      |                                            |
|              | NGLYP <b>NLS</b> K                         | P.NLS.K | 163      | 44.2                                       |
|              | NGLYP <b>NLS</b> K <b>NYTNNK(S)</b>        | P.NLS.K | 163      | 49.4 single,<br>40.8 double,<br>9.8 triple |
|              |                                            | K.NYT.N | 167      |                                            |
|              |                                            | N.NKS.K | 171      |                                            |

**Table S3. Mutations introduced into hypervariable trihead antigens, Related to Figure 3 and the STAR Methods.**

| Trihead RBS variant | Mutations                                                       |
|---------------------|-----------------------------------------------------------------|
| TH-SC18-RBS1        | A144E/S145N/K157S/S159D/T189A/Q192T/S193D                       |
| TH-SC18-RBS2        | A144M/S145N/S159N/T189E/Q192K/K222E/A227I                       |
| TH-SC18-RBS3        | A144E/S145D/S159K/T189A/Q192E/S193D/K222Q/<br>D225N/A227I       |
| TH-SC18-RBS4        | S145A/T189E/Q192K/K222E/D225N/A227K                             |
| TH-PR34-RBS1        | K144Q/S145D/K189S/Q192K/D225G/A227H                             |
| TH-PR34-RBS2        | E158Q/K189E/Q192T/N193A/K222E/D225G/A227H                       |
| TH-PR34-RBS3        | E158K/K189N/Q192I/N193S/A227S                                   |
| TH-PR34-RBS4        | Q192H/N193D                                                     |
| TH-NC99-RBS1        | G143S/K144V/G189E/R192H/K222A/E227K                             |
| TH-NC99-RBS2        | K144E/N158G/G159D/G189Q/R192L/A193N/K222V/<br>E227Q             |
| TH-NC99-RBS3        | K144Q/S145L/N158S/R192K/K222V/D225N/E227Q                       |
| TH-NC99-RBS4        | K144Q/S145L/G189Q/R192L/A193N/D225N/E227H                       |
| TH-MI15-RBS1        | A142G/G143N/A144V/A189T/Q192M/S193N                             |
| TH-MI15-RBS2        | A142G/G143N/A144V/N159D/A189K/Q192A/S193T/<br>K222T/Q225G/G227Q |
| TH-MI15-RBS3        | A144E/K145N/N159S/A189K/Q192M/S193N/K222T/<br>Q225G/G227Q       |
| TH-MI15-RBS4        | A189K/Q192A/S193T                                               |
